# Supplementary material
Source: Springer Nature journal article supplement (https://www.springermedizin.de/resource/supplementary/12891_2009_793_MOESM1_ESM.pdf/9507028)

Mean SF-36 score

100  
80  
60  
40  
20  
0

preop 12 months 4 years 5 years 7 years

Follow-up time

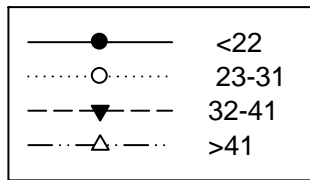

Supplement: MOESM1 [file 9507028]
